# Supplementary material for: The prevalence of brucellosis and bovine tuberculosis in ruminants in Sidi Kacem Province, Morocco
Source: PLoS One. 2018 Sep 18;13(9):e0203360. doi: 10.1371/journal.pone.0203360 (PMC6143194; doi:10.1371/journal.pone.0203360)
Supplement: S3 Dataset — (XLSX) [file pone.0203360.s003.xlsx]

## Sheet: Cattle_Sero_DATA
Animal_ID	Breed	Age_years	Age_months	Sex	IAV 05-09/12	Field_sRBT	Field_mRBT	Lab_IAV_sRBT	Lab_IAV_sSRBT_titre	UNAV 11/12	Lab_UNAV_sRBT	Lab_UNAV_mRBT	Lab_GOV_CFT	Lab_GOV_RID	Lab_UNAV_DGDNH	Lab_UNAV_LateralFlow	UNAV 03/2013	Lab_UNAV_MAT	Lab_UNAV_MAT_comments	Lab_UNAV_Coombs	Lab_UNAV_DTT	Lab_UNAV_Brucellacapt	Brucellosis_INTERPRETATION
10B07	C	12	144	F		-	+	+/-	NA		-	+	-	NA	-	-		-	NA	-	NA	1/80	POS
43B07	C	6	72	F		+	+	+	1/2		+	+	-	NA	-	-		1/40	NA	1/20	NA	1/320	POS
49B13	C	4	48	F		-	+	-	NA		-	-	-	NA	NA	NA		NA	NA	NA	NA	NA	NEG
49B14	C	6	72	F		-	+	-	NA		-	-	-	NA	NA	NA		NA	NA	NA	NA	NA	NEG
49B15	C	6	72	F		-	+	+	1/2		+/-	+/-	-	NA	-	-		-	NA	-	NA	1/80	POS
49B16	C	5	60	F		-	+	-	NA		-	+/-	-	NA	NA	NA		-	NA	-	NA	NA	NEG
51B15	C	2	24	F		-	+	-	NA		-	-	-	NA	-	-		NA	NA	NA	NA	NA	NEG
59I04	C	10	120	F		NA	+/-	-	NA		-	-	-	NA	NA	NA		NA	NA	NA	NA	NA	NEG
59I06	C	1.5	18	F		NA	+	-	NA		-	+	-	NA	-	-		-	NA	-	NA	NA	NEG
59I08	C	8	96	F		NA	+	+/-	NA		+/-	+	-	NA	-	-		1/20	NA	-	NA	1/160	POS
59I10	E	6	72	F		NA	+	-	NA		-	+	-	NA	-	-		NA	NA	NA	NA	NA	NEG
60I04	C	6.5	78	F		NA	+	+	1/2		+	+	-	NA	-	-		1/40	NA	1/40	NA	1/320	POS
63I10	C	9	108	F		-	+/-	-	NA		-	-	-	NA	NA	NA		NA	NA	NA	NA	NA	NEG
63I14	C	12	144	F		-	+/-	+/-	NA		-	+	-	NA	-	-		-	NA	1/20	NA	NA	POS
64I06	C	7	84	F		-	+/-	-	NA		-	-	-	NA	NA	NA		NA	NA	NA	NA	NA	NEG
65I09	C	2.5	30	F		-	+/-	-	NA		-	-	-	NA	NA	NA		NA	NA	NA	NA	NA	NEG
66I02	C	7	84	F		-	+/-	-	NA		-	-	-	NA	NA	NA		NA	NA	NA	NA	NA	NEG
68I01	C	2.16667	26	F		NA	+	-	NA		-	+	-	NA	-	-		NA	NA	NA	NA	NA	NEG
68I03	C	4.5	54	F		NA	+/-	-	NA		-	+/-	-	NA	-	-		-	NA	-	NA	NA	NEG
68I04	C	2.5	30	F		NA	+/-	-	NA		-	-	-	NA	NA	NA		NA	NA	NA	NA	NA	NEG
69I04	C	5	60	F		NA	+/-	-	NA		-	-	-	NA	NA	NA		NA	NA	NA	NA	NA	NEG
69I12	C	8	96	F		NA	+/-	-	NA		-	+	-	NA	-	-		-	NA	-	NA	NA	NEG
70I12	C	8	96	F		NA	+/-	-	NA		-	-	-	NA	NA	NA		NA	NA	NA	NA	NA	NEG
71I03	C	10	120	F		NA	+/-	-	NA		-	-	-	NA	NA	NA		NA	NA	NA	NA	NA	NEG
71I09	C	2	24	F		NA	+/-	-	NA		-	+/-	-	NA	-	-		-	NA	-	NA	NA	NEG
72I01	C	7	84	F		NA	+/-	-	NA		-	-	-	NA	NA	NA		NA	NA	NA	NA	NA	NEG
73I01	C	5	60	F		NA	+/-	-	NA		-	-	-	NA	NA	NA		NA	NA	NA	NA	NA	NEG
73I04	C	2	24	F		NA	+/-	-	NA		-	-	-	NA	NA	NA		NA	NA	NA	NA	NA	NEG
73I05	C	4	48	F		+	+	+	1/2		+	+	+ (1/64)	+	+ (NH, LPS)	++++		1/640	prozone 1/20	1/2560	1/320	1/1280	POS
76I22	E	2.41667	29	F		-	+	-	NA		-	-	-	NA	NA	NA		NA	NA	NA	NA	NA	NEG
77I03	C	4	48	F		NA	+	-	NA		-	-	-	NA	NA	NA		NA	NA	NA	NA	NA	NEG
77I06	C	10	120	F		NA	+/-	-	NA		-	-	-	NA	NA	NA		NA	NA	NA	NA	NA	NEG
77I07	C	4	48	F		NA	+/-	-	NA		-	-	-	NA	NA	NA		NA	NA	NA	NA	NA	NEG
77I12	C	6	72	F		NA	+/-	-	NA		-	-	-	NA	NA	NA		NA	NA	NA	NA	NA	NEG
77I15	C	6	72	F		NA	+/-	-	NA		-	-	-	NA	NA	NA		NA	NA	NA	NA	NA	NEG
77I16	C	3	36	F		NA	+/-	-	NA		-	-	-	NA	NA	NA		NA	NA	NA	NA	NA	NEG
77I20	C	1	12	M		NA	+/-	-	NA		-	-	-	NA	NA	NA		NA	NA	NA	NA	NA	NEG
77I22	C	1	12	M		NA	+/-	-	NA		-	-	-	NA	NA	NA		NA	NA	NA	NA	NA	NEG
77I26	C	0.5	6	M		NA	+/-	-	NA		-	-	-	NA	NA	NA		NA	NA	NA	NA	NA	NEG
77I28	C	0.5	6	M		NA	+/-	-	NA		-	-	-	NA	NA	NA		NA	NA	NA	NA	NA	NEG
78I03	C	6	72	F		NA	+	+	1/512		+	+	+ (1/256)	+	+ (NH, LPS)	++++		1/20480	NA	1/40960	1/40960	1/163,840	POS
78I04	C	10	120	F		NA	+	+	1/2		+	+	+ (1/32)	+	-	++		1/80	NA	1/640	NA	NA	POS
78I05	C	10	120	F		NA	-	-	NA		-	-	-	NA	NA	NA		NA	NA	NA	NA	NA	NEG
78I06	C	10	120	F		NA	+	+	1/16		+	+	+ (1/128)	+	+ (NH, LPS)	++++		1/5120	NA	1/20480	1/5120	1/20,480	POS
78I07	C	8	96	F		NA	+	+	1/4		+	+	+ (1/32)	-	-	+		1/320	NA	1/640	NA	1/640	POS
78I08	C	6	72	F		NA	+	+	1/16		+	+	+ (1/128)	+	+ (NH, LPS)	+++		1/640	prozone 1/40	1/5120	NA	1/2560	POS
78I10	C	5	60	F		NA	+	+	1/2		+	+	-	NA	-	-		1/20	NA	1/20	NA	1/160	POS
78I13	C	10	120	F		NA	+	+/-	NA		-	+	-	NA	-	-		-	NA	1/40	NA	NA	POS
78I14	C	11	132	F		NA	+	+	1/4		+	+	+ (1/32)	-	-	++		1/320	NA	1/1280	NA	≥1/2560	POS
78I16	C	4	48	F		NA	+	+	1/16		+	+	+ (1/256)	+	+ (NH, LPS)	++++		1/2560	+/- prozone 1/20	1/10240	NA	1/20,480	POS
78I17	C	8	96	F		NA	+	+	1/4		+	+	+ (1/32)	-	-	++		1/320	prozone 1/20	1/320	NA	NA	POS
78I18	C	8	96	F		NA	+	+	1/64		+	+	+ (1/256)	+	+ (NH, LPS)	+++		1/2560	NA	1/5120	NA	1/20,480	POS
78I19	C	2	24	F		NA	+	+/-	NA		-	+	-	NA	-	-		1/20	NA	1/40	NA	1/320	POS
83I01	C	2	24	F		NA	+/-	-	NA		-	-	-	NA	NA	NA		NA	NA	NA	NA	NA	NEG
83I07	C	6	72	F		NA	+	-	NA		-	+/-	-	NA	-	-		-	NA	-	NA	NA	NEG
84I02	E	3	36	F		NA	+/-	-	NA		-	-	-	NA	NA	NA		NA	NA	NA	NA	NA	NEG
84I03	C	9	108	F		NA	+	-	NA		-	-	-	NA	NA	NA		NA	NA	NA	NA	NA	NEG
84I04	C	5	60	F		NA	+	-	NA		-	-	-	NA	NA	NA		NA	NA	NA	NA	NA	NEG
84I05	C	2	24	F		NA	+/-	-	NA		-	-	-	NA	NA	NA		NA	NA	NA	NA	NA	NEG
85I04	C	5	60	F		NA	+	+	1/2		+	+	-	NA	-	-		1/40	NA	1/40	NA	1/320	POS
86I02	C	5	60	F		NA	+/-	-	NA		-	-	-	NA	NA	NA		NA	NA	NA	NA	NA	NEG
87I08	C	1	12	F		NA	+/-	-	NA		-	+/-	-	NA	-	-		-	NA	-	NA	NA	NEG
89I03	C	1.5	18	F		NA	+/-	-	NA		-	-	-	NA	NA	NA		NA	NA	NA	NA	NA	NEG
91I05	C	4	48	F		NA	+/-	-	NA		-	-	-	NA	NA	NA		NA	NA	NA	NA	NA	NEG
95I03	C	4	48	F		NA	+/-	-	NA		-	-	-	NA	NA	NA		NA	NA	NA	NA	NA	NEG
95I04	C	8	96	F		NA	+/-	-	NA		-	-	-	NA	NA	NA		NA	NA	NA	NA	NA	NEG
95I05	C	2	24	F		NA	+	-	NA		-	-	-	NA	NA	NA		NA	NA	NA	NA	NA	NEG
101I01	C	6	72	F		NA	+	-	NA		+	+	+ (1/32)	-	+ (LPS)	+++		1/640	prozone 1/20	1/640	NA	NA	POS
103I02	C	10	120	F		NA	+/-	-	NA		-	-	-	NA	NA	NA		NA	NA	NA	NA	NA	NEG
104I01	C	8	96	F		NA	+	-	NA		-	+	-	NA	-	-		-	NA	-	NA	NA	NEG
107I04	C	0		F		NA	+/-	-	NA		-	-	-	NA	NA	NA		NA	NA	NA	NA	NA	NEG
114I03	C	1	12	F		NA	+	+	1/8		+	+	-	NA	-	-		1/160	NA	1/160	1/20	1/640	POS
116I04	C	0.75	9	F		NA	+	-	NA		-	+	-	NA	-	-		-	NA	-	NA	NA	NEG
116I12	C	16	192	F		NA	+/-	-	NA		-	-	-	NA	NA	NA		NA	NA	NA	NA	NA	NEG

## Sheet: Cattle_Sero_AN
Category	Description
Animal_ID	Unique cattle identifier
Breed	Cattle breed
Age_years	Age of cattle in years
Age_months	Age of cattle in months
Sex	Sex of cattle
IAV 05-09/12	Serology screening undertaken at IAVHII from May to Sept 2012
Field_sRBT	Result of screening under field conditions with standard Rose Bengal Test
Field_mRBT	Result of screening under field conditions with modified Rose Bengal Test
Lab_IAV_sRBT	Result of screening under lab conditions at IAVHII with standard Rose Bengal Test
Lab_IAV_sSRBT_titre	Titre of positive IAV_sRBT samples
UNAV 11/12	Serology screening undertaken at UNAV November 2012
Lab_UNAV_sRBT	Result of screening under lab conditions at UNAV with standard RBT
Lab_UNAV_mRBT	Result of screening under lab conditions at UNAV with modified RBT
Lab_GOV_CFT	Result of screening under lab conditions at government lab with complement fixation test
Lab_GOV_RID	Result of screening under lab conditions at government lab with radial immunodiffusion test
Lab_UNAV_DGDNH	Result of screening under lab conditions at UNAV using double gel diffusion with native hapten test
Lab_UNAV_LateralFlow	Result of screening under lab conditions at UNAV with lateral flow immunochromatography assay
UNAV 03/2013	Serology screening undertaken at UNAV March 2013
Lab_UNAV_MAT	Result of screening under lab conditions at UNAV with micro serum agglutination test
Lab_UNAV_MAT_comments	Comments relating to screening under lab conditions at UNAV with MAT
Lab_UNAV_Coombs	Result of screening under lab conditions at UNAV with Coombs test
Lab_UNAV_DTT	Result of screening under lab conditions at UNAV with SAT-mercaptoethanol test
Lab_UNAV_Brucellacapt	Result of screening under lab conditions at UNAV with brucellacapt kit
Brucellosis_INTERPRETATION	Positive (POS) brucellosis case identified as animal + or +/- to Field_sRBT OR Lab_IAV_sRBT OR Lab_UNAV_sRBT

## Sheet: Sheep_Sero_DATA
Animal_ID	Field_sRBT	Field_mRBT	Lab_IAV_sRBT	Lab_UNAV_sRBT	Lab_UNAV_mRBT	Lab_GOV_CFT	Lab_GOV_RID	Lab_UNAV_DGD-NH	Lab_UNAV_Lateral flow	Brucellosis_INTERPRETATION
03B09OV	-	+	-	-	-	-	NA	NA	NA	NEG
59I10OV	NA	+/-	-	-	-	-	NA	NA	NA	NEG
73I12OV	-	+/-	-	-	-	-	NA	NA	NA	NEG
77I04OV	NA	+	-	-	+/-	-	NA	-	-	NEG
87I06OV	NA	+/-	-	-	-	-	NA	NA	NA	NEG
97I06OV	NA	+/-	-	-	-	-	NA	NA	NA	NEG
104I06OV	NA	+/-	-	-	-	-	NA	NA	NA	NEG
109I05OV	NA	+/-	-	-	-	-	NA	NA	NA	NEG
113I01OV	NA	+/-	-	-	-	-	NA	NA	NA	NEG
113I19OV	NA	+/-	-	-	-	-	NA	NA	NA	NEG
121I15OV	NA	+/-	-	-	-	-	NA	NA	NA	NEG
122I12OV	NA	+	-	-	+	-	NA	-	-	NEG
123I05OV	NA	+	-	-	-	-	NA	NA	NA	NEG

## Sheet: Sheep_Sero_ANNOT
Category	Description
Animal_ID	Unique cattle identifier
Field_sRBT	Result of screening under field conditions with standard Rose Bengal Test
Field_mRBT	Result of screening under field conditions with modified Rose Bengal Test
Lab_IAV_sRBT	Result of screening under lab conditions at IAVHII with standard Rose Bengal Test
Lab_UNAV_sRBT	Result of screening under lab conditions at UNAV with standard RBT
Lab_UNAV_mRBT	Result of screening under lab conditions at UNAV with modified RBT
Lab_GOV_CFT	Result of screening under lab conditions at government lab with complement fixation test
Lab_GOV_RID	Result of screening under lab conditions at government lab with radial immunodiffusion test
Lab_UNAV_DGD-NH	Result of screening under lab conditions at UNAV using double gel diffusion with native hapten test
Lab_UNAV_Lateral flow	Result of screening under lab conditions at UNAV with lateral flow immunochromatography assay
Brucellosis_INTERPRETATION	Positive (POS) brucellosis case identified as animal + or +/- to Field_sRBT OR Lab_IAV_sRBT OR Lab_UNAV_sRBT
